# Lack of PPAR $\gamma$ in Myeloid Cells Confers Resistance to *Listeria monocytogenes* Infection

Zeinab Abdullah<sup>1,9</sup>, Sergej Geiger<sup>1,9</sup>, Andrea Nino-Castro<sup>3</sup>, Jan P. Böttcher<sup>1</sup>, Eugenia Muraliv<sup>1</sup>, Moritz Gaidt<sup>1</sup>, Frank A. Schildberg<sup>1</sup>, Kati Riethausen<sup>1</sup>, Juliane Flossdorf<sup>1</sup>, Wolfgang Krebs<sup>3</sup>, Trinad Chakraborty<sup>2</sup>, Christian Kurts<sup>1</sup>, Joachim L. Schultze<sup>3</sup>, Percy A. Knolle<sup>1,4</sup>, Luisa Klotz<sup>1,4</sup>

**1** Institutes of Molecular Medicine and Experimental Immunology, Universität Bonn, Bonn, Germany, **2** Institute for Medical Microbiology, Justus-Liebig-Universität Giessen, Giessen, Germany, **3** Genomics & Immunoregulation, LIMES Institute, Universität Bonn, Bonn, Germany, **4** Clinic for Neurology – Inflammatory Disorders of the Nervous System and Neuro-oncology, Universität Münster, Münster, Germany

## Abstract

The peroxisomal proliferator-activated receptor  $\gamma$  (PPAR $\gamma$ ) is a nuclear receptor that controls inflammation and immunity. Innate immune defense against bacterial infection appears to be compromised by PPAR $\gamma$ . The relevance of PPAR $\gamma$  in myeloid cells, that organize anti-bacterial immunity, for the outcome of immune responses against intracellular bacteria such as *Listeria monocytogenes* *in vivo* is unknown. We found that *Listeria monocytogenes* infection of macrophages rapidly led to increased expression of PPAR $\gamma$ . This prompted us to investigate whether PPAR $\gamma$  in myeloid cells influences innate immunity against *Listeria monocytogenes* infection by using transgenic mice with myeloid-cell specific ablation of PPAR $\gamma$  (LysMCre $\times$ PPAR $\gamma^{\text{fllox/fllox}}$ ). Loss of PPAR $\gamma$  in myeloid cells results in enhanced innate immune defense against *Listeria monocytogenes* infection both, *in vitro* and *in vivo*. This increased resistance against infection was characterized by augmented levels of bactericidal factors and inflammatory cytokines: ROS, NO, IFN $\gamma$  TNF IL-6 and IL-12. Moreover, myeloid cell-specific loss of PPAR $\gamma$  enhanced chemokine and adhesion molecule expression leading to improved recruitment of inflammatory Ly6C<sup>hi</sup> monocytes to sites of infection. Importantly, increased resistance against *Listeria* infection in the absence of PPAR $\gamma$  was not accompanied by enhanced immunopathology. Our results elucidate a yet unknown regulatory network in myeloid cells that is governed by PPAR $\gamma$  and restrains both listeriocidal activity and recruitment of inflammatory monocytes during *Listeria* infection, which may contribute to bacterial immune escape. Pharmacological interference with PPAR $\gamma$  activity in myeloid cells might represent a novel strategy to overcome intracellular bacterial infection.

**Citation:** Abdullah Z, Geiger S, Nino-Castro A, Böttcher JP, Muraliv E, et al. (2012) Lack of PPAR $\gamma$  in Myeloid Cells Confers Resistance to *Listeria monocytogenes* Infection. PLoS ONE 7(5): e37349. doi:10.1371/journal.pone.0037349

**Editor:** Laurel L. Lenz, National Jewish Health and University of Colorado School of Medicine, United States of America

**Received:** January 23, 2012; **Accepted:** April 18, 2012; **Published:** May 21, 2012

**Copyright:** © 2012 Abdullah et al. This is an open-access article distributed under the terms of the Creative Commons Attribution License, which permits unrestricted use, distribution, and reproduction in any medium, provided the original author and source are credited.

**Funding:** This work was supported by the Deutsche Forschungsgemeinschaft (Sonderforschungsbereiche 670 and 704) and an institutional grant by BONFOR. The funders had no role in study design, data collection and analysis, decision to publish, or preparation of the manuscript.

**Competing Interests:** The authors have declared that no competing interests exist.

\* E-mail: pknolle@uni-bonn.de

9 These authors contributed equally to this work.

4 These authors also contributed equally to this work.

## Introduction

The peroxisome proliferator-activated receptor-gamma (PPAR $\gamma$ ) is a member of the nuclear hormone-receptor superfamily of ligand-activated transcription factors [1]. It is expressed in different cell types of the immune system, e.g. macrophages/monocytes [2] and lymphocytes [3]. Upon ligand binding, PPAR $\gamma$  heterodimerizes with the retinoid X receptor (RXR) and binds to PPAR response elements located in the promoter region of metabolic target genes [4]. Besides its well-studied role in metabolism and cellular differentiation, PPAR $\gamma$  is a negative regulator of inflammatory gene expression and macrophage activation [5,6]. PPAR $\gamma$  exerts its anti-inflammatory effects in part by trans-repression, i.e. negative interaction with pro-inflammatory transcription factors like NF $\kappa$ B, or by stabilization of co-repressor complexes such as SMRT or NCoR on promoters of target genes [5]. Among the genes targeted by the inhibitory function of PPAR $\gamma$  are pro-inflammatory cytokines and chemokines but also lineage-determining transcription factors, such as

ROR $\gamma$ t that promotes differentiation of pro-inflammatory TH17-cells [7]. PPAR $\gamma$  is known to have cross-regulatory function in inhibiting innate immune stimulation elicited through ligand binding to Toll like receptors [8]. Moreover, we and others have demonstrated a negative influence of PPAR $\gamma$  on the immune stimulatory capacity of dendritic cells (DC) [9,10]. Inhibition of PPAR $\gamma$  in myeloid cells led to induction of systemic inflammation even in the absence of challenge with an infectious agent [11]. There is a large number of endogenous ligands for PPAR $\gamma$  that primarily are derived from arachidonic acid metabolism and are in part induced by immune mediators such as IL-4 and IL-13 [12]. Pharmacological stimulation of PPAR $\gamma$  has been shown to lead to an increased occurrence of bacterial infections in patients [13], suggesting that PPAR $\gamma$  plays a key role in anti-bacterial defense. Also, certain gram-positive bacteria such as *Mycobacterium tuberculosis* have been shown to increase the expression of PPAR $\gamma$  [14,15]. However, there is no study on the relevance of PPAR $\gamma$  in myeloid cells for the outcome of bacterial infection,

although it is clear that myeloid cells are the key cell population in anti-bacterial defense.

*Listeria monocytogenes* is a facultative intracellular Gram-positive bacterial pathogen. Infection of humans and animals can lead to serious, often fatal disease. In humans, disease is most common among pregnant women, newborns, and immune compromised individuals [16]. Murine listeriosis is used widely as a model to study the immune response against intracellular bacterial infection [17]. Early after infection with *L. monocytogenes*, neutrophils and inflammatory monocytes phagocytose and kill invading bacteria. These phagocytic cells secrete TNF and IL-12 [18,19,20], that activate NK cells to produce IFN $\gamma$ , which in turn activates bactericidal effector functions of other phagocytes, such as oxidative burst and production of nitric oxide (NO) [21,22]. Accordingly, mice lacking these essential inflammatory mediators and mice lacking p47phox oxidase or iNOS, which are deficient in ROS or NO production, all display enhanced susceptibility to *L. monocytogenes* infection [23,24]. Recruitment of inflammatory monocytes to the site of infection, that is driven by the chemokines MCP1 (CCL2) and MCP3 (CCL7), is an important mechanism supporting development of innate immunity against *L. monocytogenes* infection [25]. Mice lacking CCL2 or CCR2 exhibit diminished inflammatory monocyte recruitment to infection sites resulting in enhanced bacterial growth and overwhelming infection [26].

It has remained unclear whether PPAR $\gamma$  with its potent regulatory activity on innate immune functions in myeloid cells plays a regulatory role during infection with *L. monocytogenes*. Here we address this question and provide clear evidence that PPAR $\gamma$  restricts innate immunity in myeloid cells against *Listeria* infection. As infection with *L. monocytogenes* leads to increased expression of PPAR $\gamma$  our results reveal a so far unrecognized regulatory network in myeloid cells that may be abused by *L. monocytogenes* to counter innate immunity.

## Materials and Methods

### Mice

Wild-type C57BL6/J and PPAR $\gamma^{\text{lox/lox}}$  mice [27] were purchased from Charles River, LysM-Cre, IFN $\gamma^{-/-}$ , TNF $^{-/-}$  and CCR2 $^{-/-}$  transgenic mice in C57BL6/J background were previously described [28,29,30,31]. All animal studies were approved by local authorities. Animals were bred and kept under specific pathogen-free conditions and used at 8–12 weeks of age in accordance with local animal experimentation guidelines. LysM-specific PPAR $\gamma$  knockout mice (LysM-PPAR $\gamma^{\text{KO}}$  mice) were generated by crossing PPAR $\gamma^{\text{lox/lox}}$  mice with LysM-Cre $^{+/-}$  transgenic mice expressing Cre-recombinase under control of the LysM promoter. These mice display no alterations in immune cell frequencies.

### Infection of mice and cells

If not indicated otherwise, mice were infected intraperitoneally with  $2 \times 10^4$  CFU of wild type *Listeria monocytogenes* (EGDe strain). Cells were infected in antibiotic free medium with *Listeria monocytogenes* at a MOI of 10 for one hour followed by one step wash with PBS and were further cultured in medium containing 50  $\mu\text{g/ml}$  Gentamycin.

### Uptake of fluorochrome labeled Listeria

Murine BMDM or PEC ( $10^6$  cells) were infected with FITC-labeled listeria (MOI 5 or 10) 1 ml medium. After 30 minutes of incubation, cells were washed with PBS followed by passage through a 30% sucrose layer to get rid of extracellular bacteria. Uptake efficiency was assessed by flow cytometry following

staining with anti-Listeria antibody to discriminate between intracellular and extracellular *Listeria*. To determine the infection efficiency of the infected BMDM and PEC, cell lysates were plated on BHI plated and incubated overnight at 37°C and CFU/cell was measured. FITC-labeled bacteria were obtained by incubation of wild type *Listeria monocytogenes* for 30 min at 37°C in PBS containing 5  $\mu\text{M}$  FITC (5,6)-fluorescein isothiocyanate mixed isomer (Thermo Scientific) at a density of  $1 \times 10^9$  CFU/ml followed by three times wash with PBS.

### Cells and cell culture

Peritoneal exudates cells (PEC) are collected from the peritoneal cavity of mice by peritoneal lavage using PBS. To achieve macrophage-rich exudates, mice were injected intraperitoneally with 1 ml of 3% thioglycolate and PEC were collected 72 hrs later. Cells were then let to adhere for 1 hr and non-adherent cells were collected. Bone marrow derived macrophages from wild-type or mutant mice were generated by collecting cells from mice tibiae and femurs and culture them in RPMI 1640 medium supplemented with FCS, Glutamate,  $\beta\text{ME}$  and 30% L929 cells conditioned medium for 7 days. Cells were cultured and infected as previously described [32]. Importantly, for all experiments BMDM were cultured in antibiotic-free medium prior to infection or adoptive transfer studies to eliminate remaining antibiotics that may interfere with bacterial growth. The purity of BMDM generated by the protocol used in this study was routinely >95% as shown by a representative analysis of CD11b and F4/80 expression (Fig. S1).

### Transfer of BMDM from LysM-PPAR $\gamma^{\text{WT}}$ and LysM-PPAR $\gamma^{\text{KO}}$

BMDM were generated as above from LysM-PPAR $\gamma^{\text{WT}}$  and LysM-PPAR $\gamma^{\text{KO}}$ . On days 6, medium was replaced with fresh medium lacking antibiotics. On day 7 of differentiation,  $5 \times 10^6$  cells were injected into the peritoneal cavity of IFN $\gamma^{-/-}$ , TNF $^{-/-}$  or CCR2 $^{-/-}$  mice. Two hours later mice were infected with  $2 \times 10^4$  CFU/ml of *Listeria monocytogenes*.

### Immunohistochemistry and immunofluorescence microscopy

Murine BMDM ( $5 \times 10^5$ ) were seeded on glass coverslips in 24-well plates overnight in antibiotic free medium. Cells were then infected with *L. monocytogenes* at MOI of 10 for 30 min. Cells were then washed with pre-warmed medium and culture further in medium containing 50  $\mu\text{g/ml}$  Gentamycin (Sigma). At indicated time points after infection, cells were washed three times with PBS and were fixed with 4% paraformaldehyde, permeabilized with 0.1% Saponin. Cells were incubated with anti-PPAR $\gamma$  in PBS containing 10% FCS and 0.1% Saponin for 1 h. After three washes with PBS, cells were incubated for 1 h at room temperature with FITC-labeled secondary antibody. After that, cells were washed three times with PBS and mounted for fluorescence microscopy. Cells were viewed with a 60 times oil objective lens. Microscopy analysis was performed with an Olympus Fluoview IX71 Microscope (Olympus).

### Cell culture and infection prior gene expression profiling

Human macrophages were generated from peripheral blood mononuclear cells (PBMC) obtained by Pancoll (PAN-Biotech, Aidenbach, Germany) density centrifugation from buffy coats of healthy donors. CD14 $^+$  monocytes were then isolated from the PBMC using CD14-specific MACS beads (Miltenyi Biotec) according to the manufacturers protocol (routinely >95% purity).

CD14<sup>+</sup> monocytes were cultured in 6-well plates in RPMI1640 medium containing 10% FCS and differentiated into immature macrophages using GM-CSF (500 U/ml; Immunotools, Friesoythe, Germany) for 72 hours. Only cultures with >95% CD14<sup>+</sup> CD68<sup>+</sup> macrophages purity were used for further analysis. Cells were infected with wild type *Listeria monocytogenes* (EGDe strain) using a MOI of 10. 24 hours after infection cells were washed twice and lysed in Trizol (Invitrogen Life Technologies, USA) prior RNA isolation. Only cultures with a cell viability of >80% were used for further analysis.

### Microarray procedure

RNA sample amplification, labeling and hybridization on Illumina HT12 Sentrix BeadChips V4 were performed according

to the manufacturer's instructions using an Illumina HiScan SQ. (Table S1) summarizes the performed microarray experiments.

### Bioinformatics Analysis

Data analyses were performed using Illumina Genome Studio and Partek Genomics Suite (PGS). Datasets were generated in Illumina and exported to PGS following the manufacturer's instruction. In PGS the quantile method was used for data normalization. Differentially expressed genes were determined using ANOVA. To identify PPAR $\gamma$  target genes regulated during infection of macrophages with *Listeria* a publicly available dataset (GSE21314) assessing genome-wide PPAR $\gamma$  binding to DNA by ChIP-Seq was downloaded from GEO. A table of genes most closely located to PPAR $\gamma$  binding sites in macrophages was

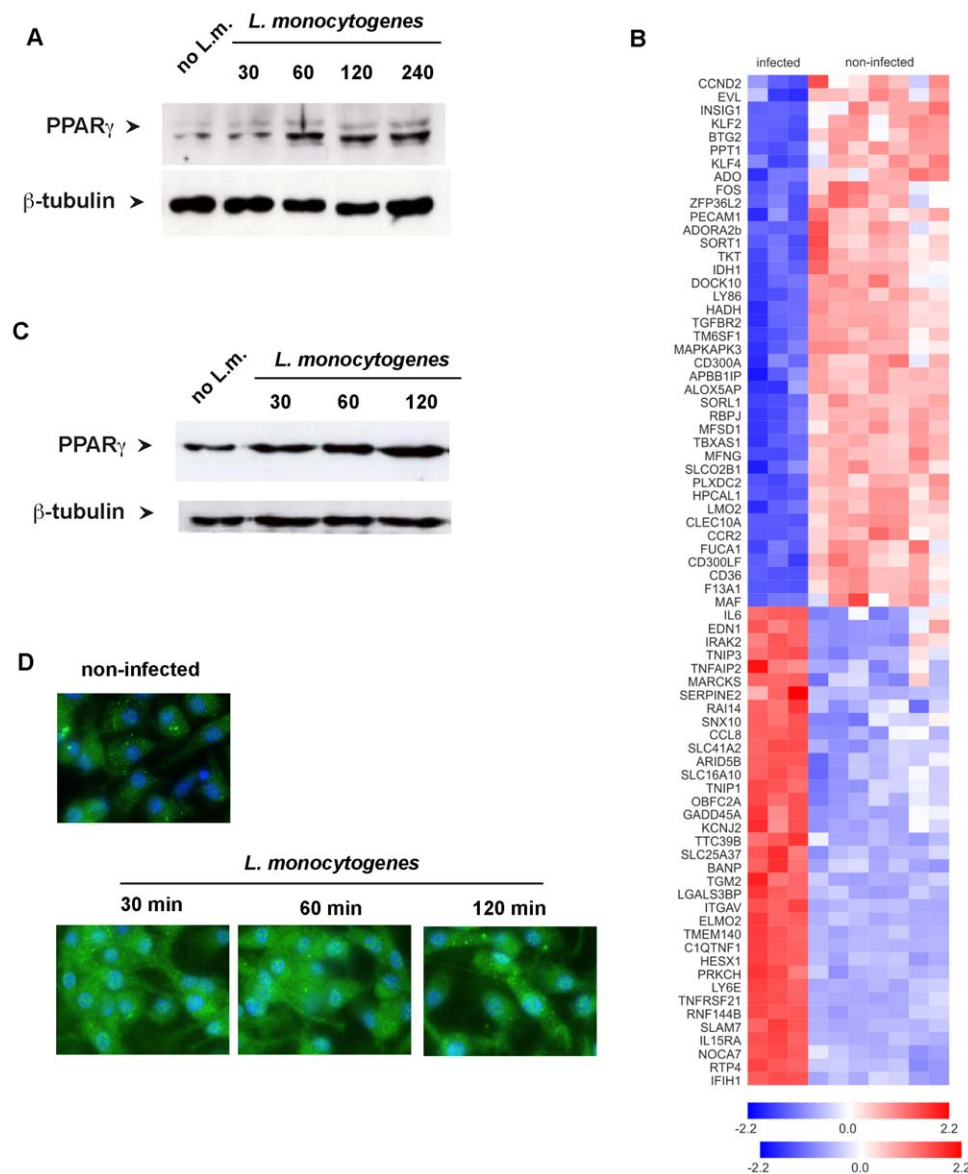

**Figure 1. PPAR $\gamma$  expression is induced in bone-marrow derived monocytes after infection with *Listeria monocytogenes*.** (A) Time course of PPAR $\gamma$  expression in human monocytes following *Listeria monocytogenes* infection detected by Western blot. (B) PPAR $\gamma$  target genes (n = 80) with the most significant differential expression in human macrophages post infection. Gene expression differences (log scale) are visualized as a heat map following hierarchical clustering of rows and columns (red = increased expression). (C,D) Time course of PPAR $\gamma$  expression in bone marrow derived macrophages (BMDM) post infection detected by Western blot or immunohistochemistry. (blue = DAPI staining the cell nucleus and *Listeria* DNA; green = PPAR $\gamma$ ). doi:10.1371/journal.pone.0037349.g001

generated (Table S2). The analysis was done with the ChIP-Seq data analysis tool HOMER (Hypergeometric Optimization of Motif EnRichment). This list of genes was used to filter genes differentially regulated in macrophages infected with *Listeria* in contrast to non-infected macrophages (Table S3). For visualization of the most differentially expressed PPAR $\gamma$  target genes ( $n=80$ ) hierarchical clustering was performed using PGS and plotted as a heatmap. The complete dataset is available at GEO (GSE34103).

### Immunoblot analysis

PPAR $\gamma$  expression was detected by immunoblot using the polyclonal anti-PPAR $\gamma$  (Santa Cruz (H-100)) and anti  $\beta$ -tubulin polyclonal antibody (Licor Bioscience) as previously described [33].

### Serum alanine aminotransferase (ALT) determination

Serum ALT was analyzed from whole blood using ALT strips from Roche according to the manufacturers instructions. Measurement was performed in a Reflovet machine from SCIL animal care.

### Flow cytometry

We used the following fluorochrome-labeled monoclonal antibodies from e-Bioscience: Anti-CD11b-PerCp-cy5.5 (M1/

70), F4/80-FITC (BM8), Ly6C-APC (HK1.4), CD11b-Pacific Blue (M1/70) and CD3-PE (G4.18) and the live/dead-APC-Cy7 (near-red) cell staining from Invitrogen. To determine the absolute cell numbers fixed numbers of CaliBRITE<sup>®</sup> Beads (BD) were added to each sample before analysis as internal reference. Analysis was performed on a FACSCanto (BD) and analyzed data with Flow-Jo<sup>®</sup> software (Tree Star). For flow cytometric analysis of intrahepatic leukocytes, livers were perfused with 20 mL 400  $\mu$ g/ml collagenase type-IV (Sigma) in Hank's balanced salt solution (HBSS), minced with scissors and subsequently digested for 15 minutes with 400  $\mu$ g/ml collagenase type-IV in HBSS at 37°C. Digested extracts were pressed through 70- $\mu$ m cell strainers to gain single-cell suspensions. Liver single cell suspension was subjected to density gradient centrifugation (25% vs 50% Percoll<sup>®</sup> (GE Healthcare)) at 2000 rpm for 20 minutes at 25°C. Leukocytes were collected from the interphase after centrifugation, washed twice with HBSS containing 2% bovine serum albumin and subjected to antibody staining for FACS analysis.

### Determination of cytokines, NO (Nitrite) and ROS

IFN $\gamma$ , TNF, IL-6, IL-12 were determined in supernatants of cell culture or sera of mice by ELISA using purified and biotinylated antibodies to IFN $\gamma$ , TNF, IL-6 and IL-12 (e-Bioscience). Nitrite concentrations were determined in the supernatant of cells 24 hrs prior to infection using the Griess Reagent Kit (Invitrogen)

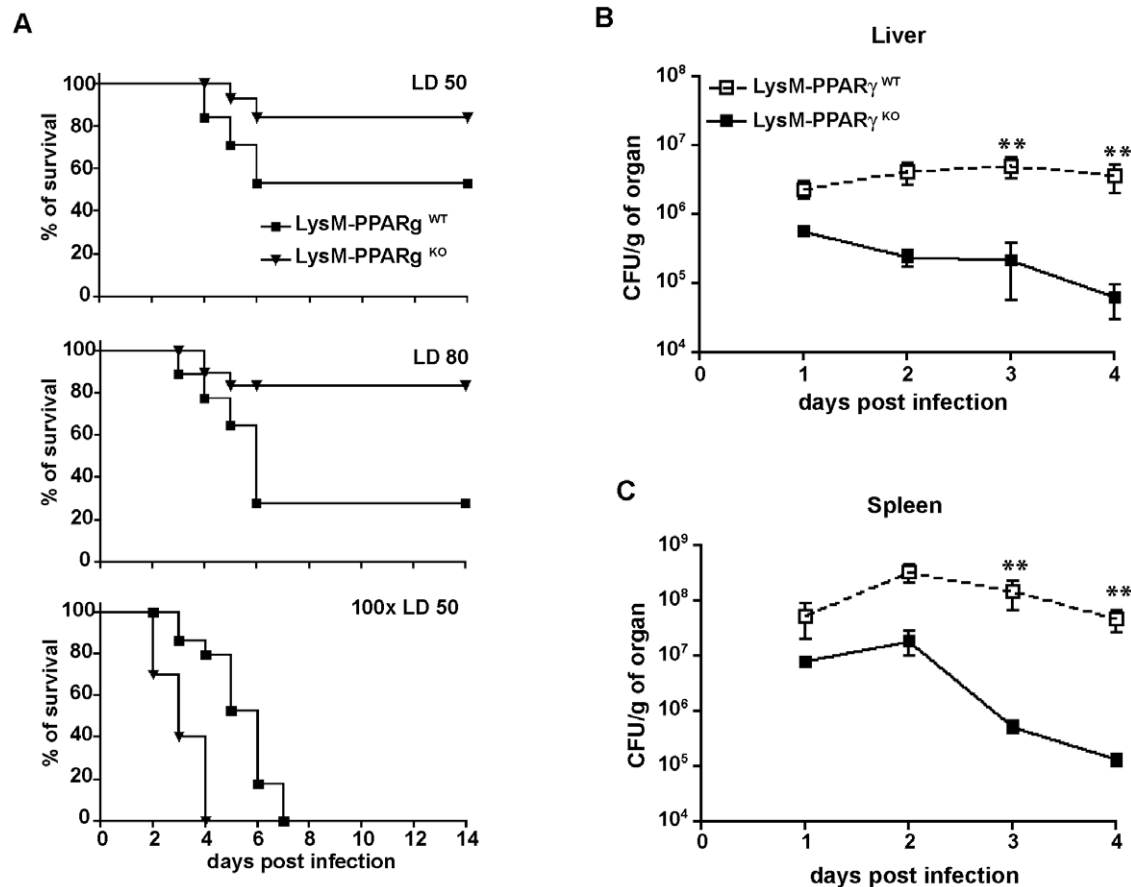

**Figure 2. Enhanced resistance of LysM-PPAR $\gamma$ <sup>KO</sup> mice to lethal infection with *Listeria monocytogenes*.** (A) Survival of LysM-PPAR $\gamma$ <sup>KO</sup> mice and LysM-PPAR $\gamma$ <sup>WT</sup> littermates after intraperitoneal infection with  $2 \times 10^4$  (LD 50),  $5 \times 10^5$  (LD 80),  $2 \times 10^6$  (100  $\times$  LD50) CFU of *Listeria*. ( $n=10$ , one representative out of three experiments is shown). LD 50:  $p=0.04$ ; LD 80: 0.01; 100  $\times$  LD50: not significant difference. (B, C) Colony forming units of *Listeria monocytogenes* in liver (B) and spleen (C) of LysM-PPAR $\gamma$ <sup>WT</sup> or LysM-PPAR $\gamma$ <sup>KO</sup> mice infected i.p. with  $2 \times 10^4$  CFU. ( $n=9$ ); significance \*\*  $p=0.005$ . doi:10.1371/journal.pone.0037349.g002

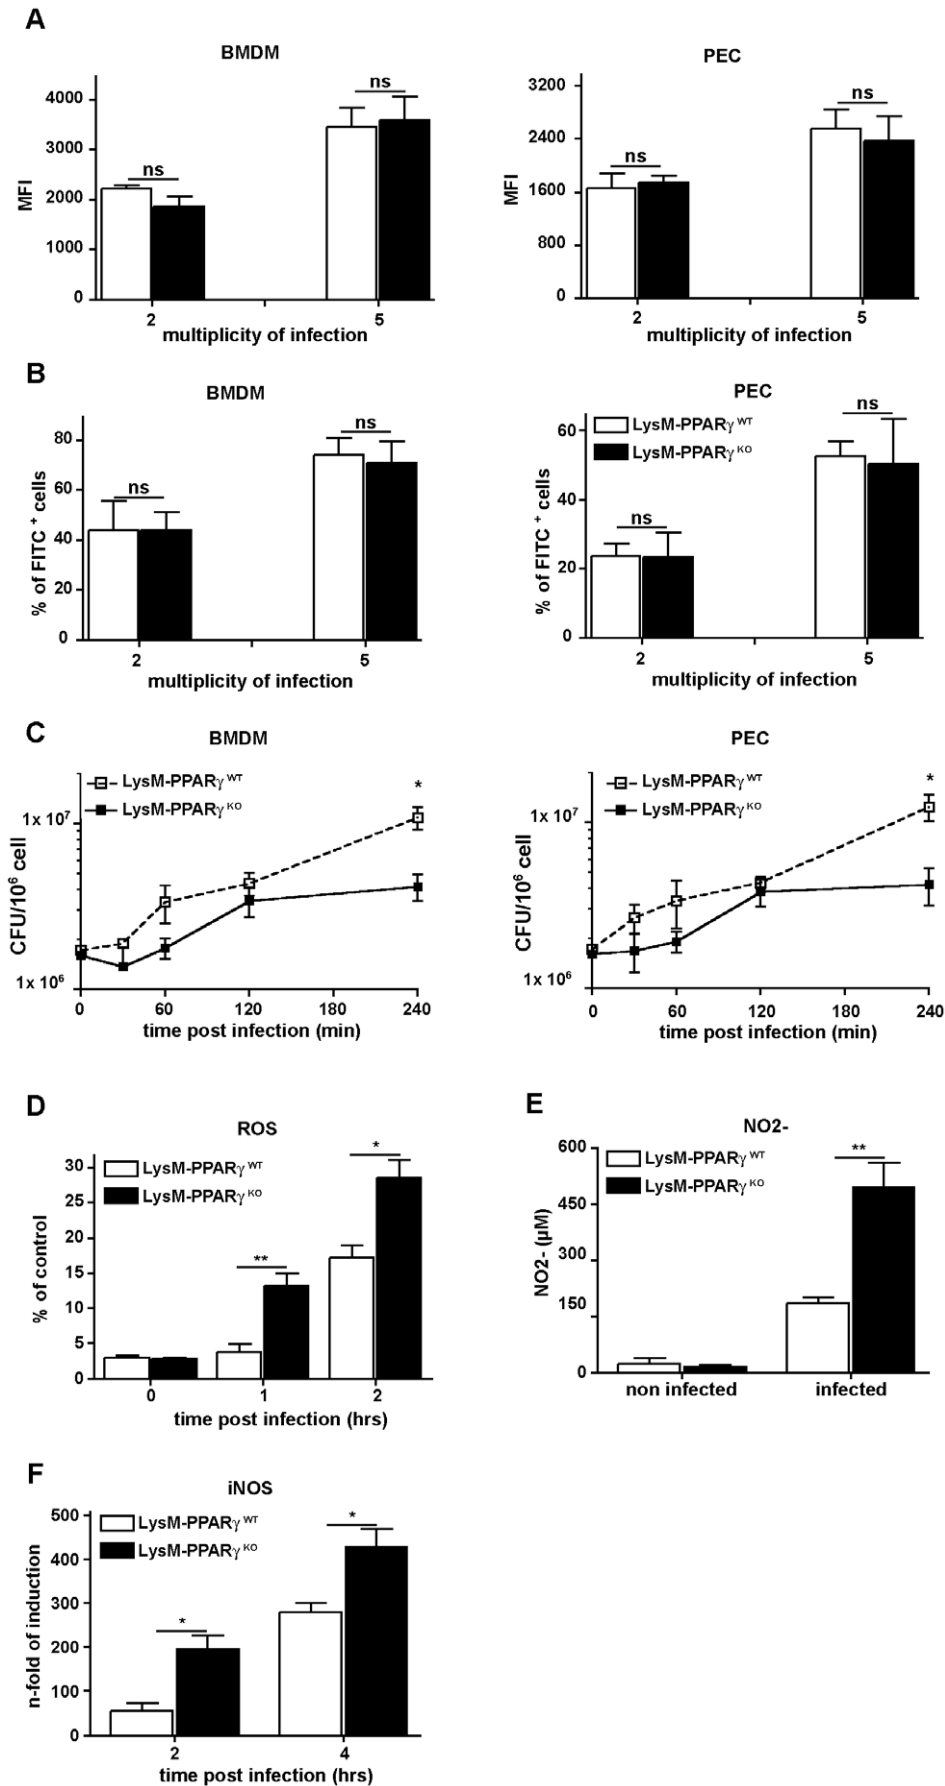

**Figure 3. Similar phagocytic capacity in myeloid cells from LysM- PPAR $\gamma$ <sup>WT</sup> and LysM- PPAR $\gamma$ <sup>KO</sup> mice.** Bone marrow derived macrophages (BMDM) and peritoneal exudates cells (PEC) from LysM- PPAR $\gamma$ <sup>WT</sup> and LysM- PPAR $\gamma$ <sup>KO</sup> mice were infected with FITC-labelled *Listeria* at MOI 2 or MOI 5. (A) Mean fluorescence intensity (MFI) of FITC positive cells was assessed by flow cytometry. and (B) Percentage of *Listeria* containing macrophages (FITC positive). (C) BMDM or PEC from LysM- PPAR $\gamma$ <sup>WT</sup> and LysM- PPAR $\gamma$ <sup>KO</sup> mice were infected with *Listeria* (MOI 10) and intracellular *Listeria* growth was determined as CFU/ml in the lysates of infected cells. The *p* values for titres of WT vs. KO at 4 hrs p.i. were <0.05 and <0.01 for BMDM and PEC, respectively. (D–F) BMDM from LysM- PPAR $\gamma$ <sup>WT</sup> and LysM- PPAR $\gamma$ <sup>KO</sup> mice were infected with *Listeria* (MOI of 10). The capacity to produce reactive oxygen species (ROS) in *Listeria* infected macrophages was determined by the OxyBURST reagent (D). At 24 hrs p.i. the concentration of NO<sub>2</sub><sup>-</sup> as surrogate marker for the production of reactive nitrogen intermediates was determined with Griess reagent (E). Expression of iNOS was analyzed by quantitative RT-PCR (F).  
doi:10.1371/journal.pone.0037349.g003

according to the manufacturer's protocol. Reactive oxygen species (ROS) production was determined using OxyBURST<sup>®</sup> Green H2DCFDA (Life Technologies) according to the manufacturer's protocol.

### Quantitative real-time PCR analysis

RNA from macrophages was extracted using the RNeasy mini kit (QIAGEN). Reverse transcription of RNA into cDNA was performed using SuperScript III (Invitrogen). Quantitative Real Time PCR (TaqMan) for PPAR $\gamma$ , IFN $\gamma$ , TNF, IL-6, IL-12, MCP-1, MCP3, CCR2 and GAPDH expression were performed using pre-designed primers and probes (Gen Expression Assay) from Applied Biosystems on an ABIPrism 7900 HT cyclor (Applied Biosystems) according to the manufacturer's instructions. All gene expression data are presented as relative expression to GAPDH.

### Ethics statement

The animal experiments within this manuscript were performed according to the guidelines for animal care enforced by the EU (EU Directive 86/609/EEC) and the state Northrhine Westphalia. The study protocol was approved by the local authorities of the state Northrhine Westphalia (8.87-50.10.31.09.033). Ethics approval for obtaining peripheral blood from healthy volunteers was given by the local ethics committee at the University Hospital Bonn and blood was only drawn from healthy donors after written consent was obtained.

### Statistical analysis

All statistical analysis was performed by Student's *t* test. Significant values are indicated as follows: \*, *p*<0.05; \*\*, *p*<0.01; and \*\*\*, *p*<0.001.

## Results

### Enhanced expression of PPAR $\gamma$ following *Listeria* infection in macrophages

As PPAR $\gamma$  is known to be up-regulated during infection of macrophages with *Mycobacteria spp.* or epithelial cells with *Salmonella spp.* [14,33], we wondered whether infection of macrophages with *Listeria monocytogenes* would also increase PPAR $\gamma$  expression. We observed a rapid and pronounced increase in the expression of PPAR $\gamma$  within 30 minutes after infection, as shown by immunoblot and immunofluorescence analysis of infected human monocytes (Fig. 1A). To address the question whether such increase in PPAR $\gamma$  levels were accompanied by transcriptional changes indicative of PPAR $\gamma$  activation, we analyzed the entire transcriptome of *Listeria*-infected human monocytes at a later time point (24 hrs p.i.) compared to non-infected monocytes. We mapped target genes of PPAR $\gamma$  in monocytes recently published as ChIP-seq data [34] onto the transcriptome of macrophages infected with *L. monocytogenes* for a longer time period. Of the 891 genes with significant increase in gene expression (FC>2, *p*<0.05)

after infection, 125 genes were PPAR $\gamma$  target genes (Table S2). Of the 883 significantly suppressed genes after *L. monocytogenes* infection 100 genes were previously identified to be PPAR $\gamma$  targets. The most differentially expressed genes are shown as a heatmap after hierarchical clustering (Fig. 1B). We confirmed these findings for bone marrow derived murine macrophages (BMDM). Already 30 minutes after infection with *L. monocytogenes* we observed an increase in PPAR $\gamma$  expression that was detected by Western Blot and immunohistochemistry (Fig. 1C,D and suppl. Fig. 2D). Taken together, these results strongly suggested that *Listeria* infection not only led to increased expression of PPAR $\gamma$  but also increased activity as transcriptional regulator.

### Myeloid cell-specific PPAR $\gamma$ -ablation augments survival of mice after *L. monocytogenes* infection

Given the early increase of expression of the anti-inflammatory factor PPAR $\gamma$  as well as the differential expression of important PPAR $\gamma$  target genes in *Listeria*-infected macrophages, we next characterized the functional role of PPAR $\gamma$  in myeloid cells in host defense against infection with *L. monocytogenes*. To this end, we generated a transgenic mouse with a myeloid cell-specific knock-out of PPAR $\gamma$  by crossing LysM-Cre mice with mice carrying loxP sites within the PPAR $\gamma$  gene (LysMCre $\times$ PPAR $\gamma$ <sup>fl/fl</sup> = LysM-PPAR $\gamma$ <sup>KO</sup>) (Fig. S2A–C). The LD<sub>50</sub> for *Listeria* infection in wildtype littermates (LysM- PPAR $\gamma$ <sup>WT</sup>) was identical to that for wildtype C57Bl/6 mice (2 $\times$ 10<sup>4</sup> CFU, data not shown). LysM-PPAR $\gamma$ <sup>WT</sup> and LysM- PPAR $\gamma$ <sup>KO</sup> mice were challenged with this dose of *L. monocytogenes* and survival was determined. LysM-PPAR $\gamma$ <sup>KO</sup> mice showed an improved survival compared to wildtype littermates (Fig. 2A), indicating that absence of PPAR $\gamma$  in myeloid cells enhances innate immune defense against *Listeria* infection. Almost 80% of LysM- PPAR $\gamma$ <sup>KO</sup> mice even resisted infection with 20-fold higher numbers of bacteria, a dose where all wildtype littermates succumbed to infection (Fig. 2A). However, when infected with very high numbers of bacteria (200 fold LD<sub>50</sub>), LysM- PPAR $\gamma$ <sup>KO</sup> mice succumbed faster than their wildtype littermates (Fig. 2A), revealing a limitation of the gain of protective myeloid cell function upon ablation of PPAR $\gamma$ .

Next, we determined whether the improved resistance to *L. monocytogenes* infection in LysM- PPAR $\gamma$ <sup>KO</sup> mice was associated with an improved clearance of infecting bacteria. Time kinetic analysis showed already at d1 after infection (2 $\times$ 10<sup>4</sup> CFU), that LysM- PPAR $\gamma$ <sup>KO</sup> mice better controlled bacterial infection than LysM- PPAR $\gamma$ <sup>WT</sup> (Fig. 2B and C). In LysM- PPAR $\gamma$ <sup>WT</sup> mice, little if any decline in bacterial numbers was observed until d4 p.i. In contrast, in LysM- PPAR $\gamma$ <sup>KO</sup> mice the numbers of *L. monocytogenes* in liver and spleen decreased over the entire time period investigated. At d3 p.i., the bacterial burden in the spleen of LysM- PPAR $\gamma$ <sup>KO</sup> mice was 100 fold lower compared to LysM-PPAR $\gamma$ <sup>WT</sup> mice (Fig. 2C). Interestingly, increased clearance of bacteria was not accompanied by an exaggerated immune response against infected tissue, because only a mild elevation of serum ALT levels was observed in LysM- PPAR $\gamma$ <sup>KO</sup> mice infected with *L. monocytogenes* (LD50 and LD80) (Fig. S3). Taken together, these

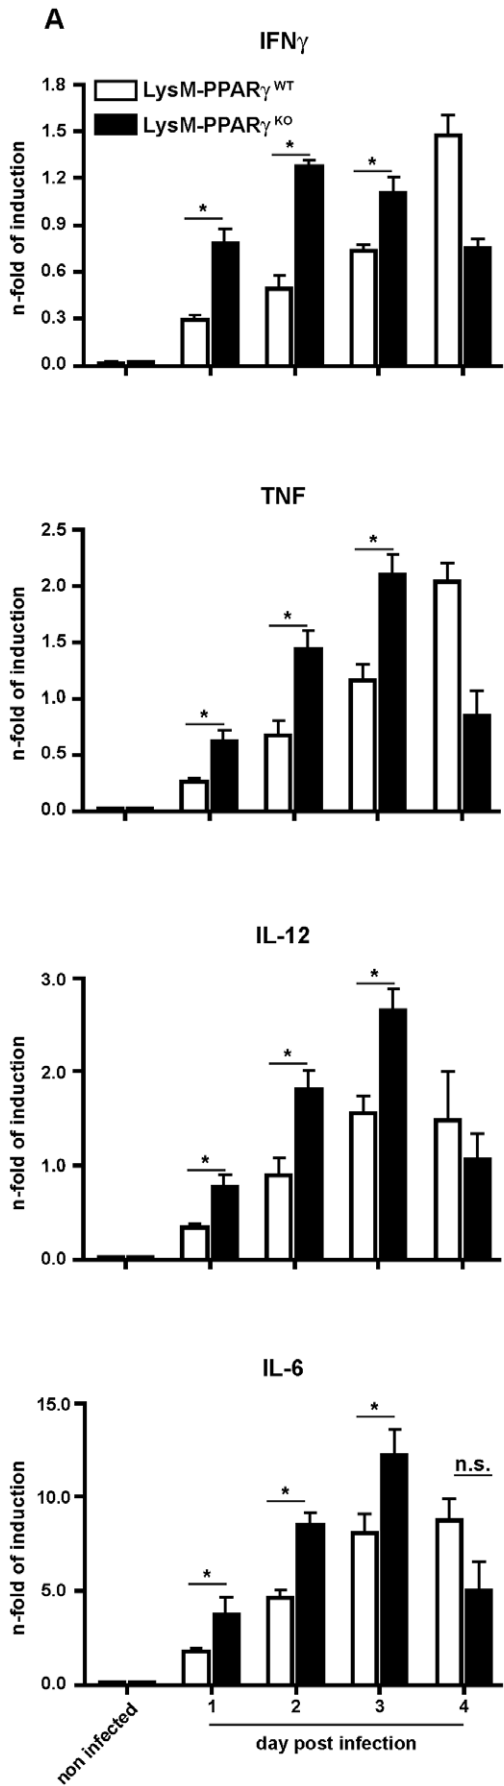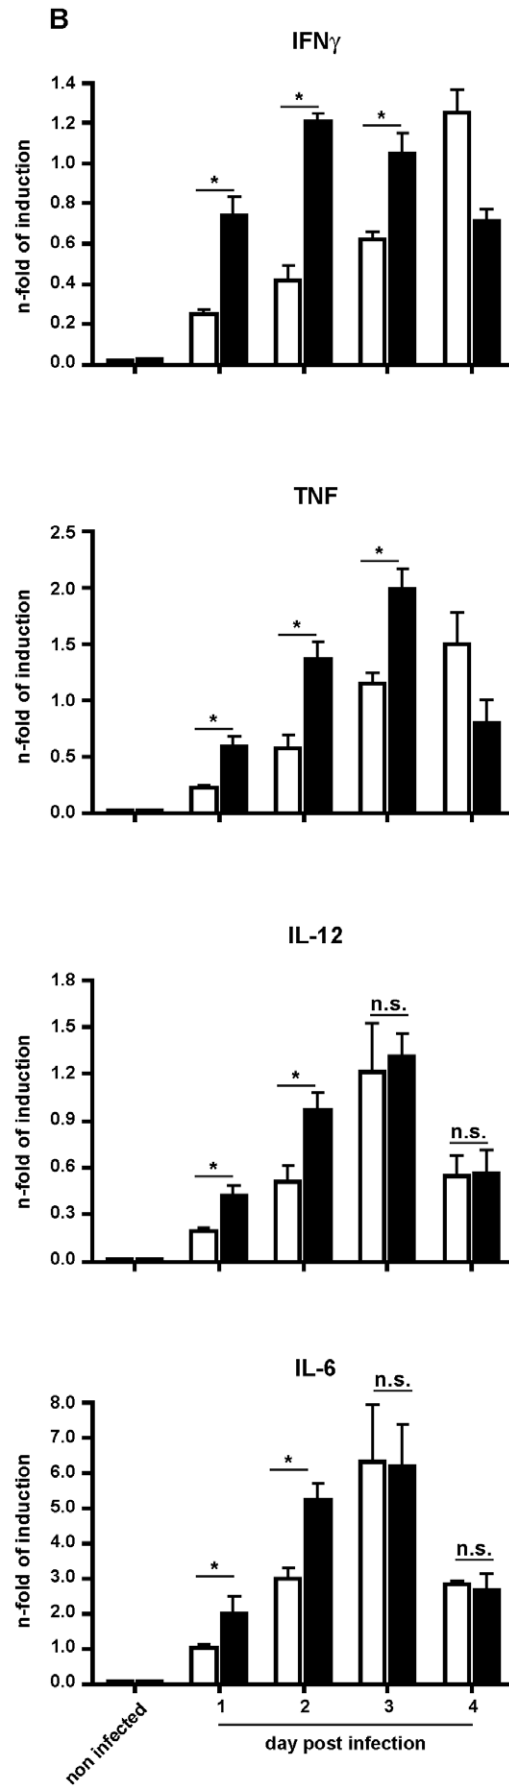

**Figure 4. Enhanced expression of inflammatory cytokines in LysM-PPAR $\gamma$ <sup>KO</sup> mice during infection with *Listeria* in vivo.** (A and B) LysM-PPAR $\gamma$ <sup>WT</sup> and LysM-PPAR $\gamma$ <sup>KO</sup> mice were infected i.p. with  $2 \times 10^4$  CFU of *Listeria*. At indicated time points, expression of IFN $\gamma$ , TNF, IL-1 $\beta$ , IL-6 and IL-12 was determined in the liver (A) and spleen (B) of mice (n = 5) by qRT-PCR. The data shown are means  $\pm$  SE of three independent experiments. doi:10.1371/journal.pone.0037349.g004

results suggest that PPAR $\gamma$  in myeloid cells interferes with innate immune responses and bacterial clearance during the early phase of the immune response against intracellular infection with *L. monocytogenes*.

#### Loss of PPAR $\gamma$ in myeloid cells enhances bactericidal activity and expression of pro-inflammatory mediators after *L. monocytogenes* infection in vitro

As we observed improved bacterial clearance in LysM-PPAR $\gamma$ <sup>KO</sup> mice we next investigated the influence of PPAR $\gamma$  on molecular mechanisms known to be critical for control of bacterial infection, such as phagocytosis and generation of listeriocidal mediators like reactive NO and ROS [16,21]. We did not detect any differences in the extent of phagocytic uptake or the percentage of phagocytic macrophages isolated from bone marrow or peritoneal cavity of either LysM-PPAR $\gamma$ <sup>KO</sup> or LysM-PPAR $\gamma$ <sup>WT</sup> mice (Fig. 3A and B). Similarly, no difference in phagocytic uptake of fluorescently labeled *L. monocytogenes* was observed (Fig. 3A and B), thus excluding that increased phagocytosis by PPAR $\gamma$ <sup>KO</sup> macrophages was responsible for improved bacterial clearance. Instead, PPAR $\gamma$ <sup>KO</sup> macrophages more efficiently controlled the growth of intracellular *L. monocytogenes* than PPAR $\gamma$ <sup>WT</sup> macrophages (Fig. 3C). Along this line, we observed that macrophages from LysM-PPAR $\gamma$ <sup>KO</sup> produced significantly higher level of the listeriocidal mediators ROS and NO<sub>2</sub>- after infection with *L. monocytogenes* compared to macrophages from LysM-PPAR $\gamma$ <sup>WT</sup> (Fig. 3D and E). As ROS production was more pronounced in PPAR $\gamma$ -deficient macrophages already early during bacterial infection (Fig. 3D) this may explain the improved subsequent early control of intracellular bacterial growth. These results were corroborated by the observation that iNOS expression was also enhanced at early time points in *Listeria*-infected PPAR $\gamma$ -deficient macrophages (Fig. 3F), findings that are in line with reports that PPAR $\gamma$  controls expression of pro-inflammatory and bactericidal mediators by interfering with NF- $\kappa$ B signaling [4,6,35].

#### Absence of PPAR $\gamma$ in myeloid cells augments production of pro-inflammatory mediators upon *L. monocytogenes* infection

Myeloid cells secrete pro-inflammatory mediators, which are essential for innate immune responses against *Listeria* infection [36,37]. To further characterize the role of PPAR $\gamma$  in myeloid cells during *L. monocytogenes* infection, we determined expression of relevant pro-inflammatory cytokines after *L. monocytogenes* infection in vivo. We observed increased expression of IFN $\gamma$ , TNF, IL-12 and IL-6 in liver and spleen of infected mice (Fig. 4A and B) and cytokine expression was found to be significantly higher in organs of PPAR $\gamma$ <sup>KO</sup> mice at d1-d3 p.i. when compared to PPAR $\gamma$ <sup>WT</sup> mice (Fig. 4A and B). In contrast, at d4 p.i. there was a pronounced reduction of IFN $\gamma$  and TNF in PPAR $\gamma$ <sup>KO</sup> compared to PPAR $\gamma$ <sup>WT</sup> mice (Fig. 4A and B), which can be explained by the rapid clearance of *L. monocytogenes* from LysM-PPAR $\gamma$ <sup>KO</sup> mice as demonstrated before. The early increased induction of proinflammatory cytokines was also observed in peritoneal macrophages isolated from PPAR $\gamma$ <sup>KO</sup> mice (Fig. S4), thus confirming the control function of PPAR $\gamma$  for these cytokines.

To provide further evidence for the role of PPAR $\gamma$  in myeloid cells, we analyzed the production of inflammatory cytokines in *L. monocytogenes* infected macrophages derived from PPAR $\gamma$ <sup>KO</sup> or PPAR $\gamma$ <sup>WT</sup> mice. Following *L. monocytogenes* infection in vitro, macrophages from PPAR $\gamma$ <sup>KO</sup> mice produced more IFN $\gamma$ , TNF, IL-6 and IL-12 compared to macrophages from PPAR $\gamma$ <sup>WT</sup> mice (Fig. 5A). These results demonstrate an important cell-intrinsic control function of PPAR $\gamma$  for pro-inflammatory cytokine production in myeloid cells after infection with *L. monocytogenes*. To investigate whether PPAR $\gamma$ -mediated control of macrophage-derived inflammatory cytokines was relevant for bactericidal activity of neighboring cells, macrophages from wildtype C57BL/6 mice were infected with *L. monocytogenes* and cultured in the presence of conditioned medium from *Listeria*-infected peritoneal macrophages isolated from LysM-PPAR $\gamma$ <sup>KO</sup> or LysM-PPAR $\gamma$ <sup>WT</sup> mice. While wildtype macrophages incubated in conditioned medium from infected PPAR $\gamma$ <sup>KO</sup> macrophages were able to restrict the growth of intracellular *Listeria* immediately after infection, macrophages cultured in conditioned medium from wild type macrophages did not rapidly control *Listeria* growth (Fig. 5B). These results indicate that ablation of PPAR $\gamma$  in myeloid cells also functioned in a paracrine fashion to increase anti-bacterial immunity in neighboring cells by proinflammatory cytokines.

#### Deletion of PPAR $\gamma$ in myeloid cells augments recruitment of inflammatory monocytes to sites of *L. monocytogenes* infection in vivo

The recruitment of inflammatory monocytes that produce TNF and NO for control of *Listeria* infection has been demonstrated to be crucial for anti-bacterial innate immune defense [38]. Clearly, the recruitment of Ly6C<sup>high</sup>CD11b<sup>+</sup> inflammatory monocytes to sites of infection was increased from d2 p.i. in LysM-PPAR $\gamma$ <sup>KO</sup> mice compared to LysM-PPAR $\gamma$ <sup>WT</sup> mice (Fig. 6A and Fig. S5). The increased number of inflammatory monocytes in LysM-PPAR $\gamma$ <sup>KO</sup> mice was not caused by reduced apoptosis as measured by expression of activated Caspase 3/7, bax, bcl2 by Western blotting (Fig. S6). As recruitment of these cells requires chemokines such as CCL2, CCL7 [23,25] and adhesion molecules such as CD54 [39], we investigated the expression of these molecules in LysM-PPAR $\gamma$ <sup>KO</sup> mice. We detected a similar up-regulation of these genes in lysates from liver (Fig. 6B) and spleen (Fig. 6C) of LysM-PPAR $\gamma$ <sup>KO</sup> mice. Consistent with this finding, in myeloid cells isolated from the peritoneal cavity after *L. monocytogenes* infection we found a significant increase in gene expression for CCL2 and CCL7 as well as the corresponding chemokine receptor CCR2, which was most pronounced at d1 and d2 after infection (Fig. S7). As entry of inflammatory monocytes into infected liver requires CD54 expression on liver endothelium [39], we exposed primary liver sinusoidal endothelial cells in vitro to supernatants of *Listeria*-infected macrophages from PPAR $\gamma$ <sup>KO</sup> or LysM-PPAR $\gamma$ <sup>WT</sup> mice. There was a significant induction of CD54 expression on LSEC when exposed to supernatants of *Listeria*-infected but not non-infected macrophages from PPAR $\gamma$ <sup>KO</sup> mice (Fig. 6D), which suggests that macrophages from PPAR $\gamma$ <sup>KO</sup> mice secrete mediators such as TNF and IFN $\gamma$  that act on LSEC to upregulate CD54 expression. These results indicate that PPAR $\gamma$  in myeloid cells controls both, chemokine as well as adhesion-molecule driven recruitment of inflammatory monocytes to sites of infection.



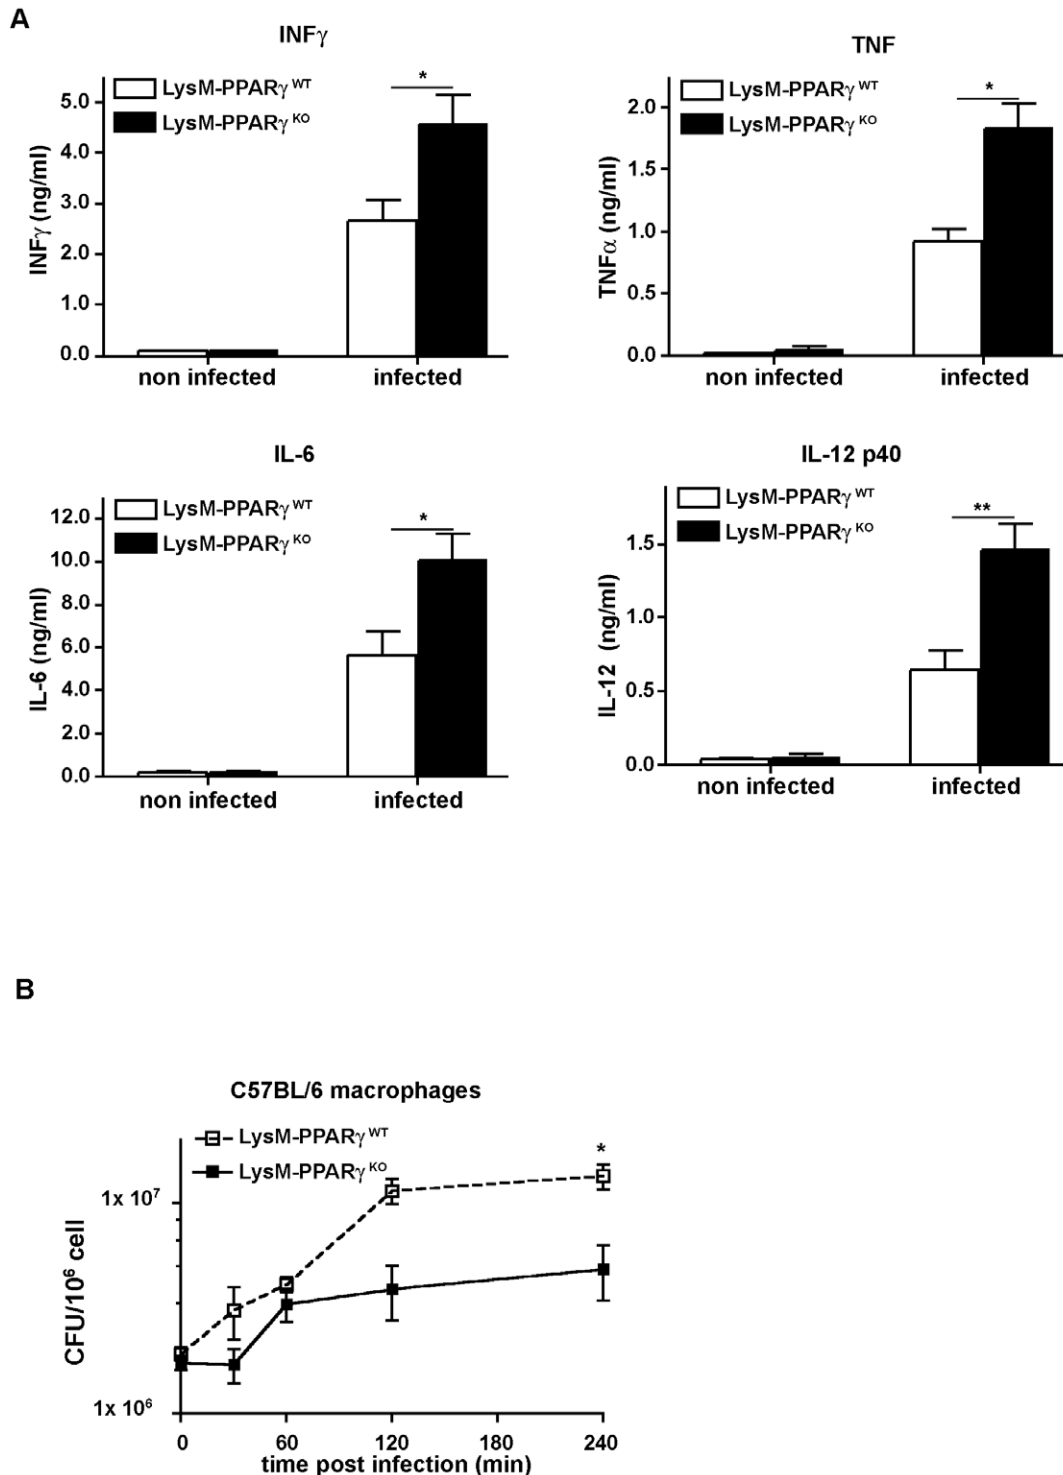

**Figure 5. Enhanced effector functions following abelation of PPAR $\gamma$  from myeloid cells.** (A) BMDM from LysM-PPAR $\gamma$ <sup>WT</sup> and LysM-PPAR $\gamma$ <sup>KO</sup> mice were infected *in vitro* with *L.monocytogenes* at a MOI 10. Expression of IFN $\gamma$ , TNF, IL-1 $\beta$ , IL-6 and IL-12 was determined 6 hrs post infection in cell culture supernatant by ELISA. The data shown are means  $\pm$  SE of three independent experiments. (B) Looking at the paracrine effects of PPAR $\gamma$  ablation in myeloid cells, we infected BMDM from wild type C57BL/6 mice with *Listeria* at an MOI of 10 and incubated them with sterile filtered conditioned medium from PPAR $\gamma$ <sup>WT</sup> or PPAR $\gamma$ <sup>KO</sup> macrophages infected previously for 18 hrs with *L. monocytogenes*; at the indicated time points intracellular *Listeria* growth was determined as CFU/ml in the lysates of infected cells. Experiments were performed in triplicates. One representative out of four experiments is shown. The *p* value for titers of wt vs. ko at 4 hrs post infection were <0.05. doi:10.1371/journal.pone.0037349.g005

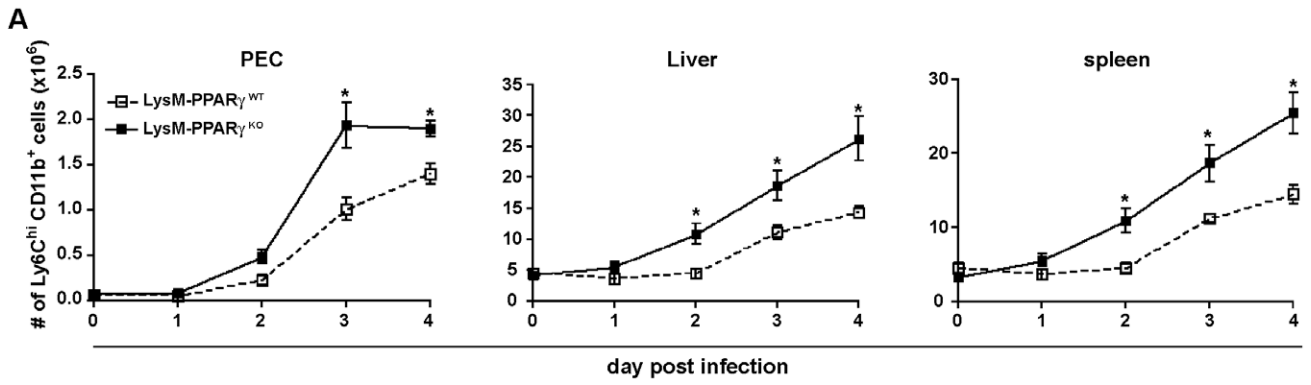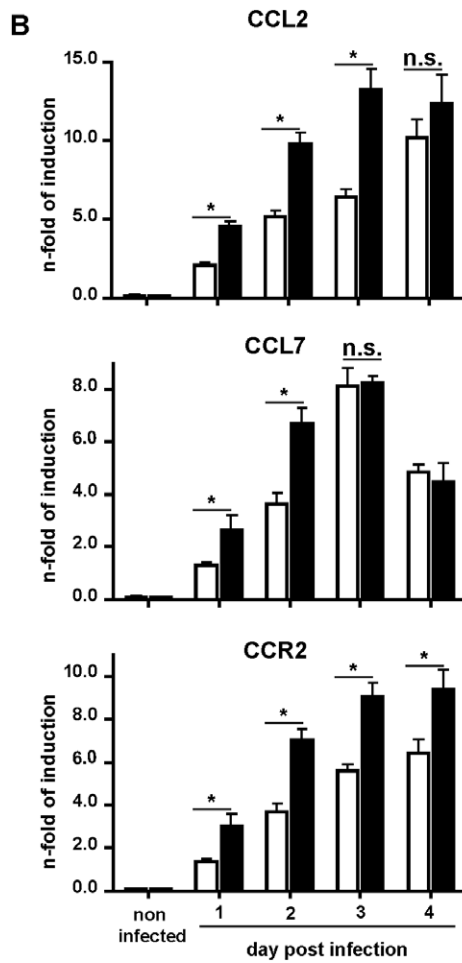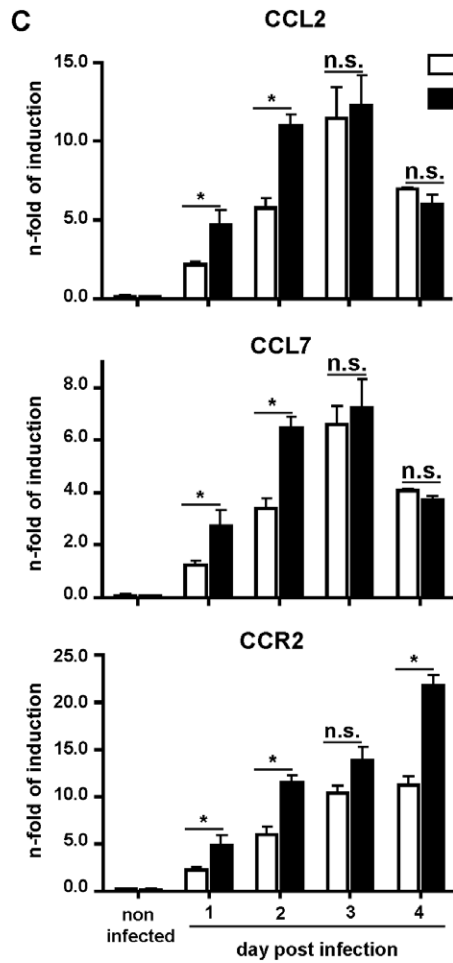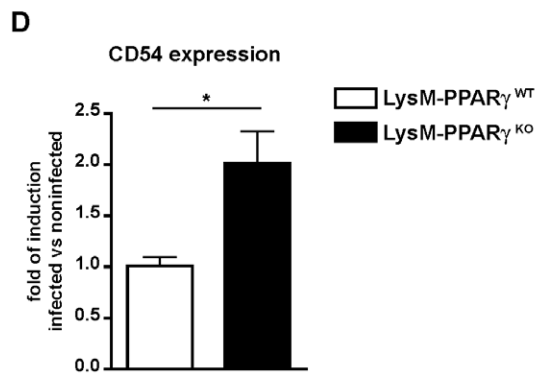

**Figure 6. Enhanced recruitment of inflammatory monocytes to the site of infection in LysM-PPAR $\gamma$ <sup>KO</sup> mice.** LysM-PPAR $\gamma$ <sup>WT</sup> and LysM-PPAR $\gamma$ <sup>KO</sup> mice were infected i.p. with *Listeria* ( $2 \times 10^4$  CFU). (A) at indicated time points total numbers of CD11b<sup>+</sup> Ly6C<sup>high</sup> monocytes in the peritoneal cavity (PEC), liver and spleen were determined by FACS analysis (B–C) Expression of CCL2, CCL7 and CCR2 in the liver (B) and spleen (C) of infected mice as determined by qRT-PCR. (D) LSEC isolated from wild type C57BL/6 mice were incubated *in vitro* with sterile filtered supernatant peritoneal macrophages from LysM-PPAR $\gamma$ <sup>WT</sup> and LysM-PPAR $\gamma$ <sup>KO</sup> mice that were either infected (18 hrs) or left non-infected. The fold increase in expression of CD54 on the surface of LSEC determined by increase in mean fluorescence intensity by flow cytometry in response to contact with supernatant from infected vs non-infected peritoneal macrophages was determined after 24 hrs.  
doi:10.1371/journal.pone.0037349.g006

### PPAR $\gamma$ ablation renders myeloid cells more competent to control *L. monocytogenes* infection *in vivo*

Finally, we elucidated the relevance of PPAR $\gamma$ -mediated regulation in myeloid cells to clear *L. monocytogenes* infection *in vivo*. As the soluble mediators IFN $\gamma$  and TNF are crucial to control infection of mice deficient for either of these mediators that rapidly succumb to infection [40,41], we chose to adoptively transfer macrophages from LysM-PPAR $\gamma$ <sup>KO</sup> or LysM-PPAR $\gamma$ <sup>WT</sup> into the peritoneal cavity of IFN $\gamma$ <sup>-/-</sup> or TNF<sup>-/-</sup> mice prior to infection of the mice. All knockout mice succumbed on day 2 p.i. and those mice that received wildtype macrophages succumbed on day 3 p.i. (Fig. 7A). In contrast, 75–80% of IFN $\gamma$ <sup>-/-</sup> or TNF<sup>-/-</sup> mice that received PPAR $\gamma$ <sup>KO</sup> macrophages survived until the end of the observation period (Fig. 7A). Direct comparison of the bacterial load in organs from these mice at d2 p.i. revealed that only IFN $\gamma$ <sup>-/-</sup> or TNF<sup>-/-</sup> mice receiving PPAR $\gamma$ <sup>KO</sup> macrophages had lower levels of bacteria in liver and spleen compared to mice receiving PPAR $\gamma$ <sup>WT</sup> macrophages (Fig. 7B). These results clearly demonstrate that ablation of PPAR $\gamma$  renders myeloid cells more competent to control infection *in vivo* presumably through the increased expression of soluble mediators as transfer of these cells restored resistance towards *Listeria* infection in cytokine-deficient animals. To address the question whether the gain of function upon PPAR $\gamma$  ablation in macrophages is already sufficient to improve control of *Listeria* infection in the absence of inflammatory monocytes, we adoptively transferred PPAR $\gamma$ -deficient macrophages into CCR2<sup>-/-</sup> mice [25]. Under these experimental conditions, we also observed reduced numbers of bacteria in the liver and spleen (Fig. 7C), which indicates that the improved function of PPAR $\gamma$ -deficient macrophages alone is already sufficient to control infection. Collectively, we report here the discovery of a so far unknown regulatory network in myeloid cells that is governed by PPAR $\gamma$  and which plays a key role in the control of innate immune responses to *L. monocytogenes* infection.

### Discussion

The immune response against infection with intracellular bacteria is orchestrated by myeloid cells [16,36,37]. These cells initiate and amplify innate immune responses leading to immediate reduction of bacteria or infected cells, and also serve as important link for the induction of adaptive immunity to achieve long-lasting protective immunity. Here, we have investigated the role of the potent anti-inflammatory transcription factor PPAR $\gamma$  in regulating the early innate immune response of myeloid cells against infection with *L. monocytogenes*. Our results identify a so far unknown central role of PPAR $\gamma$  in the coordination of listeriocidal functions and recruitment of inflammatory monocytes to the site of infection.

The expression of PPAR $\gamma$  has been shown to be augmented in macrophages after infection with pathogenic bacteria such as *Mycobacterium tuberculosis* and *Salmonella enteridis* [14,15,33]. Here, we demonstrate that also the intracellular bacterium *L. monocytogenes* increases PPAR $\gamma$  expression rapidly within 30 minutes after infection of primary murine macrophages. The molecular mechanism underlying increased expression of PPAR $\gamma$  remains

unclear and will require further investigation. It is important to note, however, that this induction of a regulatory transcription factor by *Listeria* infection occurs immediately upon infection and before an inflammatory response was mounted. This is clearly different from immunoregulatory mediators such as IL-10, which typically are expressed after inflammation has been induced and serves in many infections to restrict detrimental immunopathology [42]. Although there is evidence that autoactivation may occur if large numbers of PPAR $\gamma$  are present in a cell [43], PPAR $\gamma$  is a ligand-activated receptor raising the question whether increased expression levels were also associated with PPAR $\gamma$ -activation. Gene expression analysis of *Listeria monocytogenes* infected macrophages revealed regulation of PPAR $\gamma$  responsive gene sets indicating that PPAR $\gamma$  has likely undergone ligand-activation after infection. It is possible that other cell populations such as mast cells through production of IL-4 may contribute to increased production of endogenous PPAR $\gamma$  ligands *in vivo* [44]. However, our data demonstrating increased bactericidal function of PPAR $\gamma$ <sup>KO</sup> compared to PPAR $\gamma$ <sup>WT</sup> macrophages against *Listeria* infection *in vitro* suggest that there is also induction of endogenous PPAR $\gamma$  ligands in macrophages themselves. It appears likely that *L. monocytogenes* infection induced increased expression of endogenous ligands as we have previously reported that following *Listeria* infection of myeloid cells COX2 expression was induced [45], that leads to generation of prostanoids that can serve as PPAR $\gamma$  ligands.

Given the potent anti-inflammatory effects of PPAR $\gamma$  by transrepression of NF- $\kappa$ B and stabilization of co-repressor complexes on promoters of pro-inflammatory genes [1], such induction of PPAR $\gamma$  in macrophages upon bacterial infection may give rise to escape from innate immune responses acting on various immune effector mechanisms, because PPAR $\gamma$  targets many pro-inflammatory genes [8]. We investigated this question by generating transgenic mice lacking PPAR $\gamma$  in myeloid cells. Indeed, myeloid-cell specific knockout of PPAR $\gamma$  rendered mice more resistant to infection with *L. monocytogenes* supporting the assumption that PPAR $\gamma$  expression can help bacteria to evade the early phases of innate immunity. Lack of PPAR $\gamma$  in myeloid cells resulted in increased expression of essential inflammatory mediators such as TNF, IFN $\gamma$  and IL-12, which in a paracrine fashion stimulated further IFN $\gamma$  expression by NK cells (data not shown). Our findings of increased expression in PPAR $\gamma$ -deficient myeloid cells are consistent with earlier reports that pro-inflammatory mediators such as TNF and IFN are target genes of PPAR $\gamma$  [34]. The lack of PPAR $\gamma$  in myeloid cells also increased expression of iNOS and production of the listeriocidal NO, which most likely occurred indirectly through the augmented production of pro-inflammatory mediators, because iNOS does not belong to PPAR $\gamma$ -regulated genes [34].

In addition to increased bactericidal activity, PPAR $\gamma$  ablation in myeloid cells resulted in enhanced recruitment of inflammatory monocytes to the site of infection. We observed increased expression of the key chemokines relevant for inflammatory monocyte recruitment, i.e. CCL2 and CCL7 [46] as well as their receptor CCR2, in the absence of PPAR $\gamma$  in myeloid cells. CCL2 and CCR2 are target genes of PPAR $\gamma$  [34], which again supports

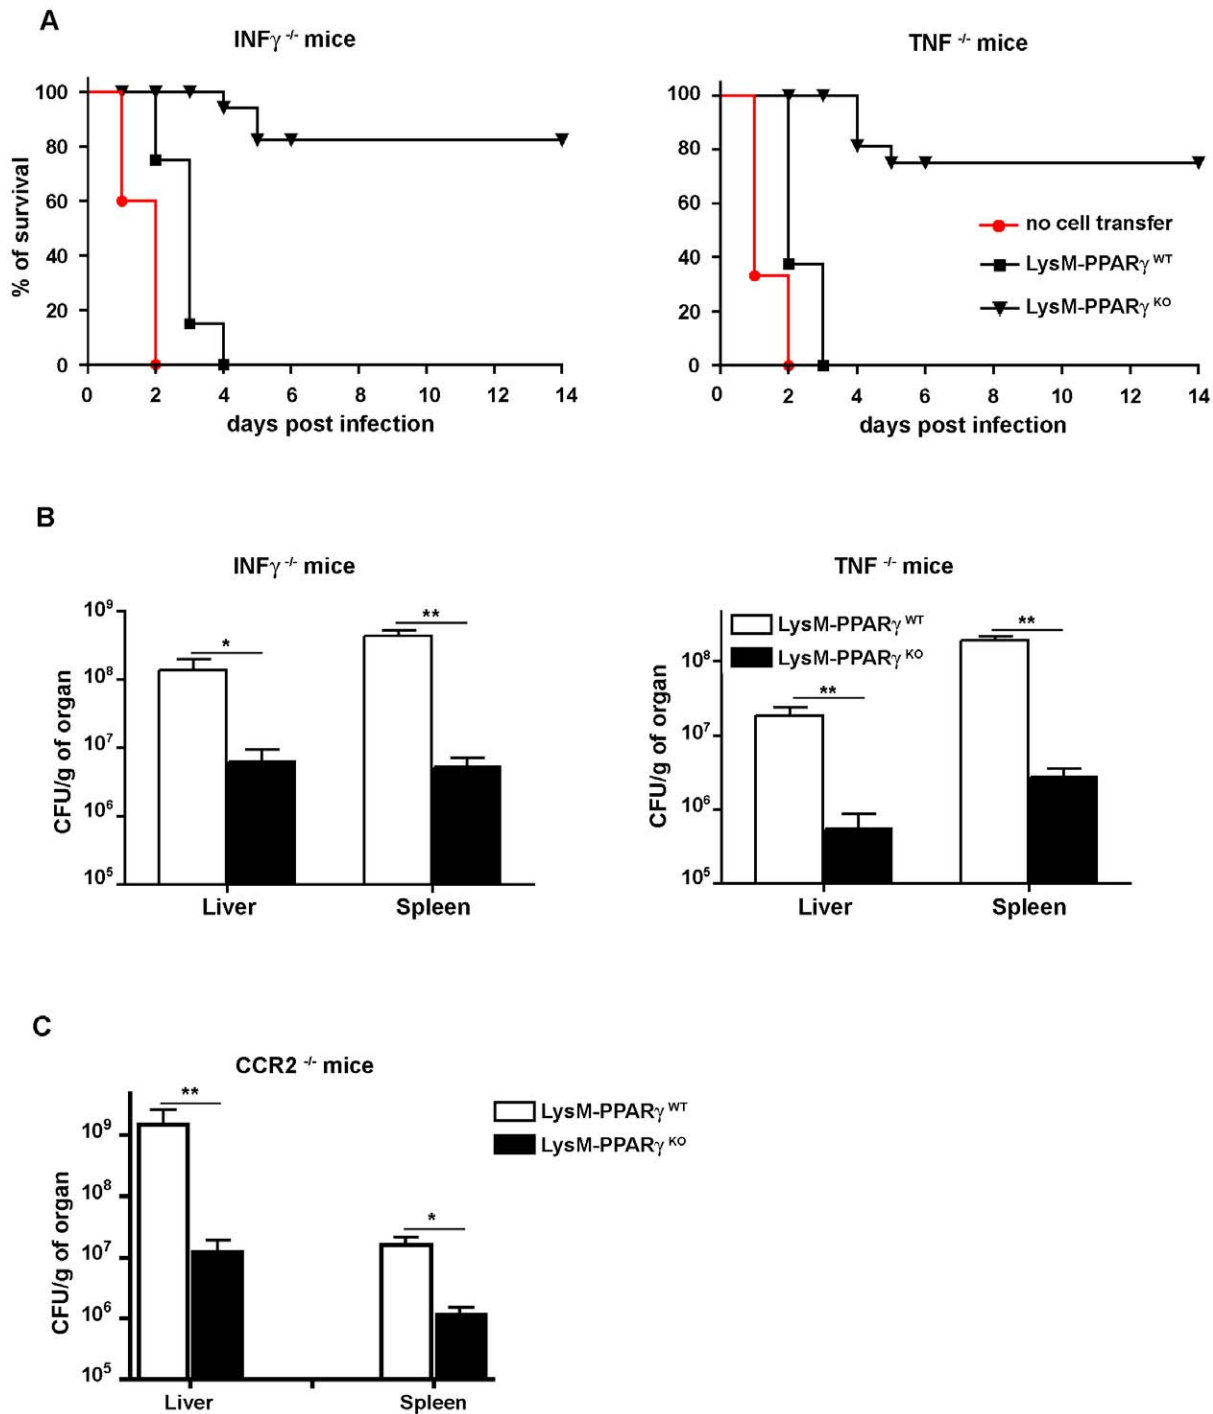

**Figure 7. Transfer of PPAR $\gamma$ -deficient macrophages increases the resistance of IFN $\gamma$ <sup>-/-</sup>, TNF<sup>-/-</sup> and CCR2<sup>-/-</sup> mice to *Listeria* infection.**  $5 \times 10^6$  BMDM from LysM-PPAR $\gamma$ <sup>WT</sup> or LysM-PPAR $\gamma$ <sup>KO</sup> mice were adoptively transferred into the peritoneal cavity of IFN $\gamma$ <sup>-/-</sup>, TNF<sup>-/-</sup> or CCR2<sup>-/-</sup> mice and two hours later mice (n=10) were infected with  $2 \times 10^4$  CFU of *Listeria*. (A) Survival of IFN $\gamma$ <sup>-/-</sup> and TNF<sup>-/-</sup> mice after infection with *Listeria*. Knockout mice not receiving any cells by adoptive transfer served as controls. Significance for results in IFN $\gamma$ <sup>-/-</sup> and TNF<sup>-/-</sup> mice were  $p < 0.0001$ . (B and C) On day 2 after infection, CFU were determined in the homogenates of spleen and liver. One representative out of three independent experiments is shown. doi:10.1371/journal.pone.0037349.g007

our notion that PPAR $\gamma$  regulates anti-bacterial immunity in myeloid cells in a cell-intrinsic fashion. As inflammatory monocytes differentiate into dendritic cell subset, so-called tipDCs, within inflamed tissues [26], it is possible that PPAR $\gamma$  also controls the numbers of tipDCs at the site of infection. This assumption is

supported by a recent publication demonstrating that pharmacologic PPAR $\gamma$  activation reduced chemokine-driven recruitment and local proliferation of tipDCs during viral infection [47]. While chemokine-expression is sufficient for the recruitment of CCR2<sup>+</sup> monocytes into the spleen [46], expression of CD54 (ICAM-1) was

shown to be required for the recruitment of these cells to the liver [39]. Here, we show that ablation of PPAR $\gamma$  in myeloid cells also led to release of mediators that subsequently increased expression of CD54 on liver sinusoidal endothelial cells, the cell population that is responsible for recruitment of immune cells from blood passing through the liver [39,48]. The recruitment of inflammatory monocytes is of key importance in immune defense against bacterial, fungal and parasite infections [38,49]. Thus, our results demonstrate that PPAR $\gamma$  in myeloid cells has a central role in controlling both, the orchestration of bactericidal activity and immune cell recruitment to the site of infection.

PPAR $\gamma$  has been reported to have anti-inflammatory effects in many immune cell populations. Recently, we have shown that lack of PPAR $\gamma$  in T cells facilitates ROR $\gamma$ t-mediated development of pro-inflammatory T<sub>H17</sub> cells and thereby promotes central nervous system autoimmunity [7]. Activation of PPAR $\gamma$  in dendritic cells impairs their ability to elicit T cell mediated immunity [10]. As augmented expression of PPAR $\gamma$  and increased expression of endogenous ligands generated by the enzyme 12/15-lipoxygenase are observed under inflammatory conditions [44], it is possible that PPAR $\gamma$  plays a role in the prevention of overzealous immunity within inflamed tissues, similar to the expression of co-inhibitory molecules like B7H1 acting on PD1 on T cells to prevent organ immunopathology [50]. In fact, PPAR $\gamma$  in intestinal epithelial cells is essential to maintain absence of inflammation from the gut [33]. Our findings raise the question whether absence of PPAR $\gamma$  from myeloid cells, which improves early anti-bacterial innate immunity, comes at the price of increased immunopathology to infected organs. However, we did not observe any increase in liver injury in mice infected with an LD<sub>50</sub> of *Listeria monocytogenes* lacking PPAR $\gamma$  in myeloid cells (data not shown), indicating that improved anti-bacterial immunity was not accompanied by increased immunopathology. Even at higher doses of bacteria (LD<sub>80</sub>) we did not observe immunopathology to infected organs such as the liver in LysM-PPAR $\gamma$ <sup>KO</sup> mice. Only when challenged with very high numbers of bacteria (100 $\times$  LD<sub>50</sub>) this resistance to infection was broken and mice lacking PPAR $\gamma$  in myeloid cells then died even more rapidly than their wildtype littermates. The balance between pro- and anti-inflammatory signals, such as IL-10, TGF $\beta$  and factors released from regulatory T cells, decides about the outcome between immunity and immunopathology to viruses [51], and generation of regulatory macrophages restricts immunity to bacterial infection [52]. Whereas all these regulatory mechanisms act during the late innate or early adaptive phases of the immune response against infectious pathogens, our results reveal a so far unrecognized early control of anti-bacterial innate effector mechanisms through PPAR $\gamma$  activation restricting inflammation, which are not coupled to immunopathology once inactivated. As survival of *L. monocytogenes* in myeloid cells such as dendritic cells is critical for the successful establishment of infection [53,54], it appears likely that induction of PPAR $\gamma$  by *L. monocytogenes* is a critical step during infection and may serve as early escape from innate immunity.

Taken together our results support the notion that PPAR $\gamma$  represents a valuable target for pharmacologic intervention that when neutralized during bacterial infection would lead to preferential enhancement of immune-mediated clearance of intracellular bacteria such as *L. monocytogenes* without accompanying immunopathology to infected organs like the liver.

## Supporting Information

**Figure S1** Purity of bone marrow derived macrophages obtained from LysM-PPAR $\gamma$ <sup>WT</sup> and LysM-PPAR $\gamma$ <sup>KO</sup> mice.

Cells were generated as described in Materials and Methods and on day 7 cells were stained with  $\alpha$ CD11b-PerCp-Cy5.5 and F4/80-FITC.

(TIF)

**Figure S2** PPAR $\gamma$  ablation in myeloid cells. (A, B) RT-PCR analysis of mRNA isolated from bone marrow derived macrophages, neutrophil granulocytes, CD11c<sup>+</sup> splenic cells, CD4<sup>+</sup> or CD8<sup>+</sup> T cells and B cells derived from LysM-PPAR $\gamma$ <sup>KO</sup> (A) or from bone marrow derived macrophages from LysMCrexPPAR $\gamma$ <sup>fllox/fllox</sup>, LysMCrexPPAR $\gamma$ <sup>WT</sup>, PPAR $\gamma$ <sup>fllox/fllox</sup> and C57BL/6 mice or CD8<sup>+</sup> T cells from LysMCrexPPAR $\gamma$ <sup>fllox/fllox</sup> mice. Expression of Cre-recombinase in myeloid cells results in a specific deletion of exons 1 and 2 of the PPAR $\gamma$  gene shown by a truncated 300 bp fragment of PPAR $\gamma$  cDNA, in contrast to the full-length 700 bp wildtype cDNA. For the remainder of the manuscript LysMCrexPPAR $\gamma$ <sup>fllox/fllox</sup> are referred to as LysM-PPAR $\gamma$ <sup>KO</sup> (C) The decrease of PPAR $\gamma$  at the protein level was confirmed by immunoblot in lysates of peritoneal macrophages from LysMCrexPPAR $\gamma$ <sup>fllox/fllox</sup>, LysMCrexPPAR $\gamma$ <sup>WT</sup> and PPAR $\gamma$ <sup>fllox/fllox</sup> mice. (D) Infecting *L. monocytogenes* were detected by DAPI-staining. For better visibility gray scale conversion of immunofluorescence pictures are shown. Some infecting *Listeria* are indicated by arrow heads.

(TIF)

**Figure S3** Determination of serum ALT levels. Alanine aminotransferase levels in serum were determined in mice LysM-PPAR $\gamma$ <sup>WT</sup> and LysM-PPAR $\gamma$ <sup>KO</sup> mice following infection with different doses of *L. monocytogenes*.

(TIF)

**Figure S4** Enhanced expression of inflammatory cytokines in PPAR $\gamma$ <sup>KO</sup> macrophages during *Listeria* infection *in vivo*. LysM-PPAR $\gamma$ <sup>WT</sup> and LysM-PPAR $\gamma$ <sup>KO</sup> mice were infected with 2 $\times$ 10<sup>4</sup> CFU of *L. monocytogenes*. At indicated time points peritoneal macrophages were isolated and the expression of IFN $\gamma$ , TNF $\alpha$ , IL-6 and IL-12 was assessed by qRT-PCR.

(TIF)

**Figure S5** Gating strategy and representative flow cytometric data for increase of inflammatory monocytes. LysM-PPAR $\gamma$ <sup>WT</sup> and LysM-PPAR $\gamma$ <sup>KO</sup> mice were infected i.p. with *Listeria* (2 $\times$ 10<sup>4</sup> CFU). (A) Gating strategy for identifying viable inflammatory monocytes. (B) At indicated time points the frequency of CD11b<sup>+</sup> Ly6C<sup>high</sup> monocytes within viable cells isolated from the liver were determined by FACS analysis. Quantification of inflammatory monocyte cell numbers was done using fluorochrome-labeled microbeads (CountBright absolute counting beads, life technologies, Invitrogen).

(TIF)

**Figure S6** Annexin V staining of inflammatory monocytes from LysM-PPAR $\gamma$ <sup>WT</sup> and LysM-PPAR $\gamma$ <sup>KO</sup> mice. Detection of Annexin V levels on the surface of inflammatory monocytes isolated from the liver of *Listeria*-infected LysM-PPAR $\gamma$ <sup>WT</sup> and LysM-PPAR $\gamma$ <sup>KO</sup> mice at the indicated time points. 3 mice per group were analysed, one out of three representative experiments is shown.

(TIF)

**Figure S7** Enhanced expression of CCL2 and CCL7 and their receptor CCR2 in PPAR $\gamma$ <sup>KO</sup> macrophages during *Listeria* infection *in vivo*. LysM-PPAR $\gamma$ <sup>WT</sup> and LysM-PPAR $\gamma$ <sup>KO</sup> mice were infected with 2 $\times$ 10<sup>4</sup> CFU of *Listeria*. At indicated time points peritoneal macrophages were isolated and the expression of CCL2, CCL7 and CCR2 was assessed by qRT-PCR.

(TIF)

**Table S1** List of arrays performed.  
(DOCX)

**Table S2** List of genes most closely located to PPAR $\gamma$  binding sites in macrophages.  
(XLSX)

**Table S3** List of genes differentially regulated in macrophages infected with *Listeria* in compared to non-infected macrophages.  
(XLSX)

## References

- Glass CK, Saijo K (2010) Nuclear receptor transrepression pathways that regulate inflammation in macrophages and T cells. *Nature reviews Immunology* 10: 365–376.
- Marx N, Sukhova G, Murphy C, Libby P, Plutzky J (1998) Macrophages in human atheroma contain PPAR $\gamma$ : differentiation-dependent peroxisomal proliferator-activated receptor  $\gamma$  expression and reduction of MMP-9 activity through PPAR $\gamma$  activation in mononuclear phagocytes in vitro. *Am J Pathol* 153: 17–23.
- Clark RB, Bishop-Bailey D, Estrada-Hernandez T, Hla T, Puddington L, et al. (2000) The nuclear receptor PPAR  $\gamma$  and immunoregulation: PPAR  $\gamma$  mediates inhibition of helper T cell responses. *J Immunol* 164: 1364–1371.
- Pascual G, Fong AL, Ogawa S, Gamliel A, Li AC, et al. (2005) A SUMOylation-dependent pathway mediates transrepression of inflammatory response genes by PPAR- $\gamma$ . *Nature* 437: 759–763.
- Jiang C, Ting AT, Seed B (1998) PPAR- $\gamma$  agonists inhibit production of monocyte inflammatory cytokines. *Nature* 391: 82–86.
- Ricote M, Li AC, Willson TM, Kelly CJ, Glass CK (1998) The peroxisome proliferator-activated receptor- $\gamma$  is a negative regulator of macrophage activation. *Nature* 391: 79–82.
- Klotz L, Burgdorf S, Dani I, Saijo K, Flossdorf J, et al. (2009) The nuclear receptor PPAR  $\gamma$  selectively inhibits Th17 differentiation in a T cell-intrinsic fashion and suppresses CNS autoimmunity. *J Exp Med* 206: 2079–2089.
- Glass CK, Ogawa S (2006) Combinatorial roles of nuclear receptors in inflammation and immunity. *Nature reviews Immunology* 6: 44–55.
- Nencioni A, Grunbach F, Zobywalski A, Denzlinger C, Brugger W, et al. (2002) Dendritic cell immunogenicity is regulated by peroxisome proliferator-activated receptor  $\gamma$ . *J Immunol* 169: 1228–1235.
- Klotz L, Dani I, Edenhofer F, Nolden L, Evert B, et al. (2007) Peroxisome proliferator-activated receptor  $\gamma$  control of dendritic cell function contributes to development of CD4 $^{+}$  T cell anergy. *J Immunol* 178: 2122–2131.
- Wu L, Yan C, Czader M, Foreman O, Blum JS, et al. (2011) Inhibition of peroxisome proliferator-activated receptor- $\gamma$  in myeloid lineage cells induces systemic inflammation, immunosuppression and tumorigenesis. *Blood*.
- Straus DS, Glass CK (2007) Anti-inflammatory actions of PPAR ligands: new insights on cellular and molecular mechanisms. *Trends in immunology* 28: 551–558.
- Singh S, Loke YK, Furberg CD (2011) Long-term use of thiazolidinediones and the associated risk of pneumonia or lower respiratory tract infection: systematic review and meta-analysis. *Thorax* 66: 383–388.
- Stavrum R, Stavrum AK, Valvatne H, Riley LW, Ulvestad E, et al. (2011) Modulation of Transcriptional and Inflammatory Responses in Murine Macrophages by the Mycobacterium tuberculosis Mammalian Cell Entry (Mce) 1 Complex. *PLoS one* 6: e26295.
- Almeida PE, Silva AR, Maya-Monteiro CM, Torocsik D, D'Avila H, et al. (2009) Mycobacterium bovis bacillus Calmette-Guerin infection induces TLR2-dependent peroxisome proliferator-activated receptor  $\gamma$  expression and activation: functions in inflammation, lipid metabolism, and pathogenesis. *Journal of immunology* 183: 1337–1345.
- Edelson BT, Unanue ER (2000) Immunity to *Listeria* infection. *Curr Opin Immunol* 12: 425–431.
- Cossart P, Toledo-Arana A (2008) *Listeria monocytogenes*, a unique model in infection biology: an overview. *Microbes Infect* 10: 1041–1050.
- Havell EA (1987) Production of tumor necrosis factor during murine listeriosis. *J Immunol* 139: 4225–4231.
- Tripp CS, Wolf SF, Unanue ER (1993) Interleukin 12 and tumor necrosis factor  $\alpha$  are costimulators of interferon  $\gamma$  production by natural killer cells in severe combined immunodeficiency mice with listeriosis, and interleukin 10 is a physiologic antagonist. *Proc Natl Acad Sci U S A* 90: 3725–3729.
- Hsieh CS, Macatonia SE, Tripp CS, Wolf SF, O'Garra A, et al. (1993) Development of TH1 CD4 $^{+}$  T cells through IL-12 produced by *Listeria*-induced macrophages. *Science* 260: 547–549.
- Unanue ER (1997) Inter-relationship among macrophages, natural killer cells and neutrophils in early stages of *Listeria* resistance. *Curr Opin Immunol* 9: 35–43.
- Zenewicz LA, Shen H (2007) Innate and adaptive immune responses to *Listeria* monocytogenes: a short overview. *Microbes Infect* 9: 1208–1215.
- Serbina NV, Kuziel W, Flavell R, Akira S, Rollins B, et al. (2003) Sequential MyD88-independent and -dependent activation of innate immune responses to intracellular bacterial infection. *Immunity* 19: 891–901.
- Shiloh MU, MacMicking JD, Nicholson S, Brause JE, Potter S, et al. (1999) Phenotype of mice and macrophages deficient in both phagocyte oxidase and inducible nitric oxide synthase. *Immunity* 10: 29–38.
- Serbina NV, Pamer EG (2006) Monocyte emigration from bone marrow during bacterial infection requires signals mediated by chemokine receptor CCR2. *Nat Immunol* 7: 311–317.
- Serbina NV, Salazar-Mather TP, Biron CA, Kuziel WA, Pamer EG (2003) TNF/iNOS-producing dendritic cells mediate innate immune defense against bacterial infection. *Immunity* 19: 59–70.
- Hevener AL, He W, Barak Y, Le J, Bandyopadhyay G, et al. (2003) Muscle-specific Pparg deletion causes insulin resistance. *Nature medicine* 9: 1491–1497.
- Dalton DK, Pitts-Meek S, Keshav S, Figari IS, Bradley A, et al. (1993) Multiple defects of immune cell function in mice with disrupted interferon- $\gamma$  genes. *Science* 259: 1739–1742.
- Pasparakis M, Alexopoulou L, Episkopou V, Kollias G (1996) Immune and inflammatory responses in TNF  $\alpha$ -deficient mice: a critical requirement for TNF  $\alpha$  in the formation of primary B cell follicles, follicular dendritic cell networks and germinal centers, and in the maturation of the humoral immune response. *J Exp Med* 184: 1397–1411.
- Clausen BE, Burkhardt C, Reith W, Renkawitz R, Forster I (1999) Conditional gene targeting in macrophages and granulocytes using LysMcre mice. *Transgenic research* 8: 265–277.
- Kuziel WA, Morgan SJ, Dawson TC, Griffin S, Smithies O, et al. (1997) Severe reduction in leukocyte adhesion and monocyte extravasation in mice deficient in CC chemokine receptor 2. *Proceedings of the National Academy of Sciences of the United States of America* 94: 12053–12058.
- Popov A, Abdullah Z, Wickenhauser C, Saric T, Driesen J, et al. (2006) Indoleamine 2,3-dioxygenase-expressing dendritic cells form suppurative granulomas following *Listeria monocytogenes* infection. *The Journal of clinical investigation* 116: 3160–3170.
- Kelly D, Campbell JI, King TP, Grant G, Jansson EA, et al. (2004) Commensal anaerobic gut bacteria attenuate inflammation by regulating nuclear-cytoplasmic shuttling of PPAR- $\gamma$  and RelA. *Nature immunology* 5: 104–112.
- Lefterova MI, Steger DJ, Zhuo D, Qatanani M, Mullican SE, et al. (2010) Cell-specific determinants of peroxisome proliferator-activated receptor  $\gamma$  function in adipocytes and macrophages. *Molecular and cellular biology* 30: 2078–2089.
- Malur A, McCoy AJ, Arce S, Barna BP, Kavuru MS, et al. (2009) Deletion of PPAR  $\gamma$  in alveolar macrophages is associated with a Th-1 pulmonary inflammatory response. *J Immunol* 182: 5816–5822.
- Pamer EG (2004) Immune responses to *Listeria* monocytogenes. *Nature reviews Immunology* 4: 812–823.
- Stavru F, Archambaud C, Cossart P (2011) Cell biology and immunology of *Listeria* monocytogenes infections: novel insights. *Immunological reviews* 240: 160–184.
- Serbina NV, Jia T, Hohl TM, Pamer EG (2008) Monocyte-mediated defense against microbial pathogens. *Annual review of immunology* 26: 421–452.
- Shi C, Velazquez P, Hohl TM, Leiner I, Dustin ML, et al. (2010) Monocyte trafficking to hepatic sites of bacterial infection is chemokine independent and directed by focal intercellular adhesion molecule-1 expression. *Journal of immunology* 184: 6266–6274.
- Harty JT, Bevan MJ (1995) Specific immunity to *Listeria* monocytogenes in the absence of IFN  $\gamma$ . *Immunity* 3: 109–117.
- Pfeffer K, Matsuyama T, Kundig TM, Wakeham A, Kishihara K, et al. (1993) Mice deficient for the 55 kd tumor necrosis factor receptor are resistant to endotoxic shock, yet succumb to *L. monocytogenes* infection. *Cell* 73: 457–467.
- Saraiva M, O'Garra A (2010) The regulation of IL-10 production by immune cells. *Nature reviews Immunology* 10: 170–181.
- Klotz L, Schmidt M, Giese T, Sastre M, Knolle P, et al. (2005) Proinflammatory stimulation and pioglitazone treatment regulate peroxisome proliferator-activated receptor  $\gamma$  levels in peripheral blood mononuclear cells from healthy controls and multiple sclerosis patients. *J Immunol* 175: 4948–4955.
- Huang JT, Welch JS, Ricote M, Binder CJ, Willson TM, et al. (1999) Interleukin-4-dependent production of PPAR- $\gamma$  ligands in macrophages by 12/15-lipoxygenase. *Nature* 400: 378–382.

## Acknowledgments

We thank the Flow Cytometry Core Facility at the IMMEI for their support.

## Author Contributions

Conceived and designed the experiments: ZA JLS TC CK PAK LK. Performed the experiments: ZA SG EM FAS KR JF JPB MG. Analyzed the data: WK ANC. Wrote the paper: ZA TC CK JLS PAK LK.

45. Popov A, Driesen J, Abdullah Z, Wickenhauser C, Beyer M, et al. (2008) Infection of myeloid dendritic cells with *Listeria monocytogenes* leads to the suppression of T cell function by multiple inhibitory mechanisms. *Journal of immunology* 181: 4976–4988.
46. Jia T, Leiner I, Dorothee G, Brandl K, Pamer EG (2009) MyD88 and Type I interferon receptor-mediated chemokine induction and monocyte recruitment during *Listeria monocytogenes* infection. *J Immunol* 183: 1271–1278.
47. Aldridge JR, Jr., Moseley CE, Boltz DA, Negovetich NJ, Reynolds C, et al. (2009) TNF/ $\text{iNOS}$ -producing dendritic cells are the necessary evil of lethal influenza virus infection. *Proceedings of the National Academy of Sciences of the United States of America* 106: 5306–5311.
48. von Oppen N, Schurich A, Hegenbarth S, Stabenow D, Tolba R, et al. (2009) Systemic antigen cross-presented by liver sinusoidal endothelial cells induces liver-specific CD8 T-cell retention and tolerization. *Hepatology* 49: 1664–1672.
49. Shi C, Pamer EG (2011) Monocyte recruitment during infection and inflammation. *Nature reviews Immunology* 11: 762–774.
50. Dong H, Zhu G, Tamada K, Flies DB, van Deursen JM, et al. (2004) B7-H1 determines accumulation and deletion of intrahepatic CD8(+) T lymphocytes. *Immunity* 20: 327–336.
51. Rouse BT, Schrawat S (2010) Immunity and immunopathology to viruses: what decides the outcome? *Nature reviews Immunology* 10: 514–526.
52. Popov A, Schultze JL (2008) IDO-expressing regulatory dendritic cells in cancer and chronic infection. *Journal of molecular medicine* 86: 145–160.
53. Neuenhahn M, Kerksiek KM, Nauerth M, Suhre MH, Schiemann M, et al. (2006) CD8 $\alpha$ + dendritic cells are required for efficient entry of *Listeria monocytogenes* into the spleen. *Immunity* 25: 619–630.
54. Verschoor A, Neuenhahn M, Navarini AA, Graef P, Plaumann A, et al. (2011) A platelet-mediated system for shuttling blood-borne bacteria to CD8 $\alpha$ (+) dendritic cells depends on glycoprotein GPIb and complement C3. *Nature immunology* 12: 1194–1201.
